# Supplementary material
Source: publisher figshare collection journal article supplement (https://tandf.figshare.com/ndownloader/files/18790838)
Supplement: Supplementary file 1 [file 18790838]

**Supporting Information**

**Cybotactic Nematic phases with wide ranges in photoresponsive polycatenars**

Mohamed Alaasar,*a,bSilvio Poppe,b

[a] Department of Chemistry, Faculty of Science, Cairo University, Giza, Egypt; [malaasar@sci.cu.edu.eg](mailto:malaasar@sci.cu.edu.eg)

[b] Institute of Chemistry, Martin Luther University Halle-Wittenberg, Kurt Mothes Str. 2, D-06120 Halle (Saale), Germany

**Contents**

1. **NMR Spectra of compounds A-E** ………………………………………. S1
2. **Additional DSC curves** …………………………………………………...S6

**1. NMR Spectra of compounds A-E**


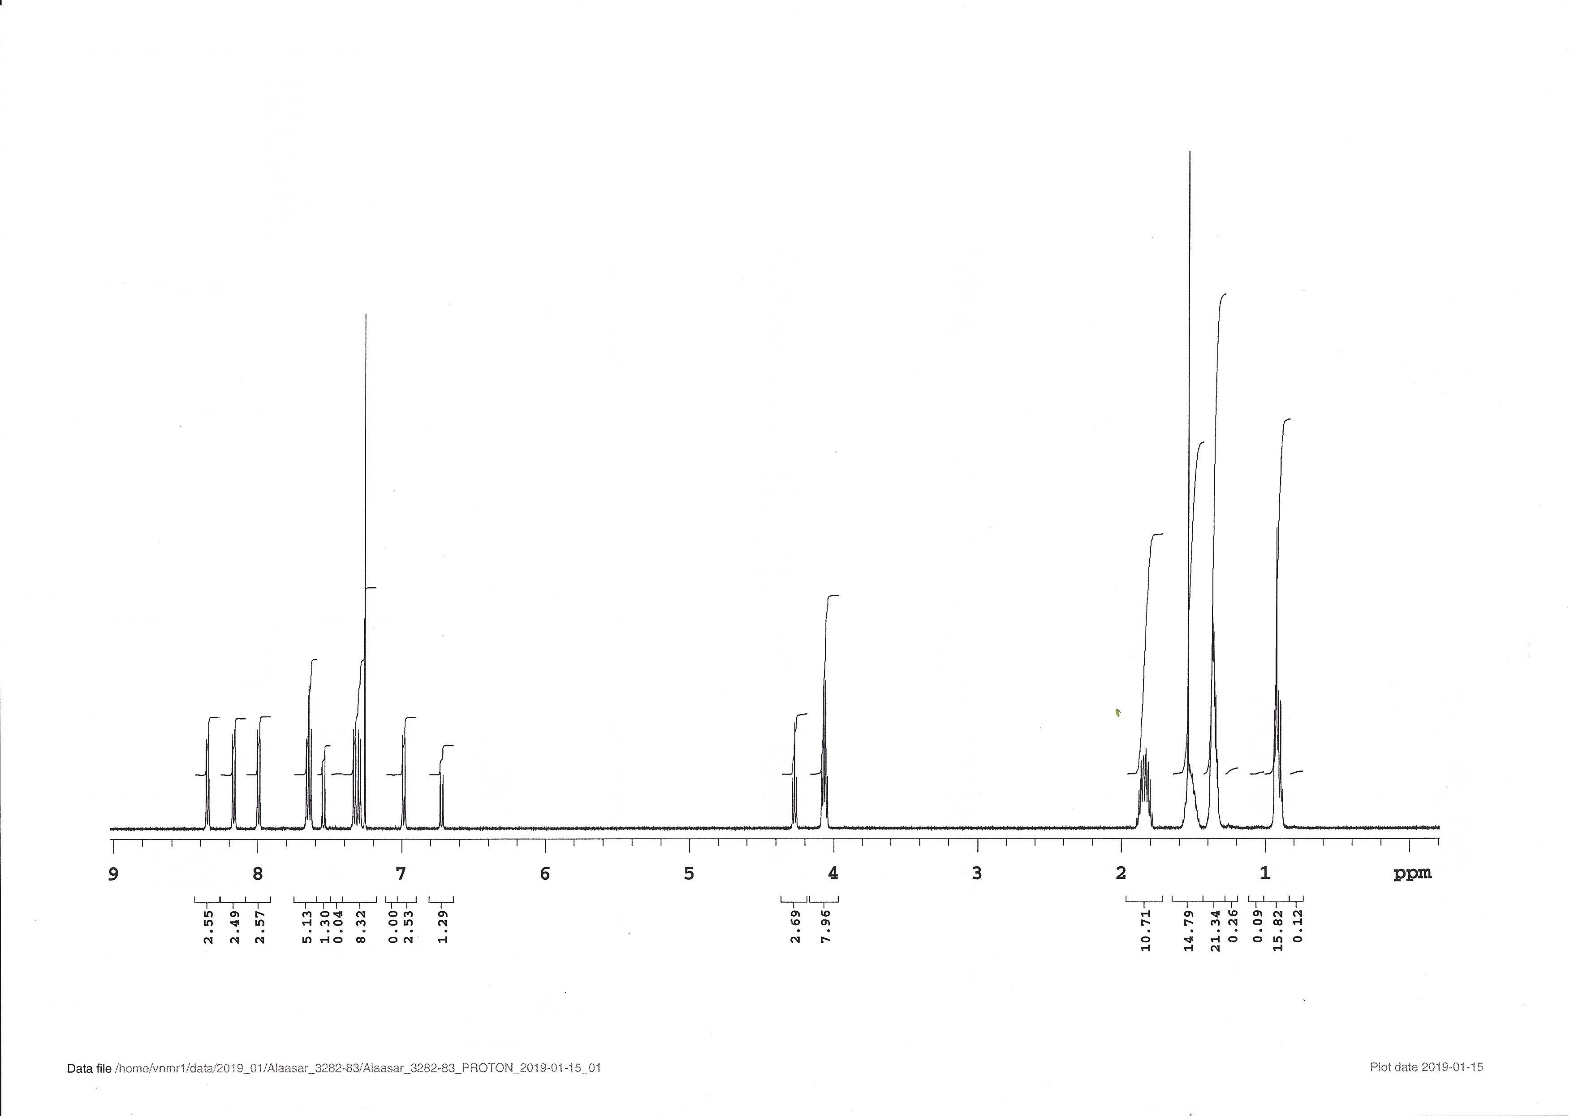


**Figure S1.** 1H-NMR Spectrum of **A** in CDCl3.


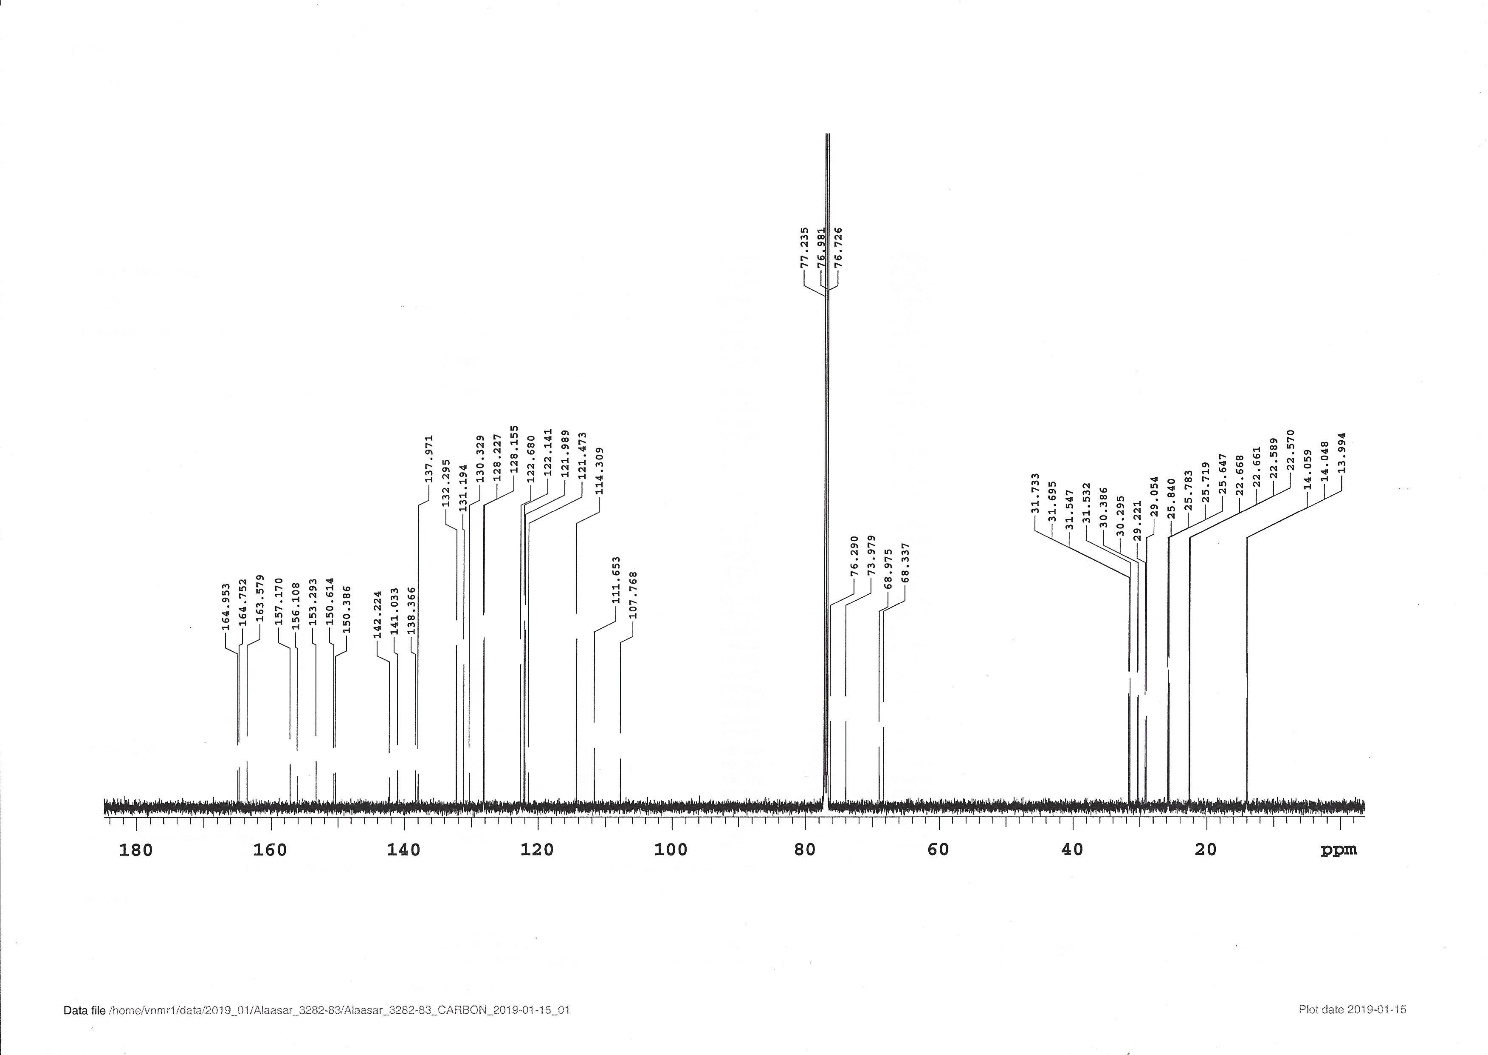


**Figure S2.** 13C-NMR Spectrum of **A** in CDCl3.


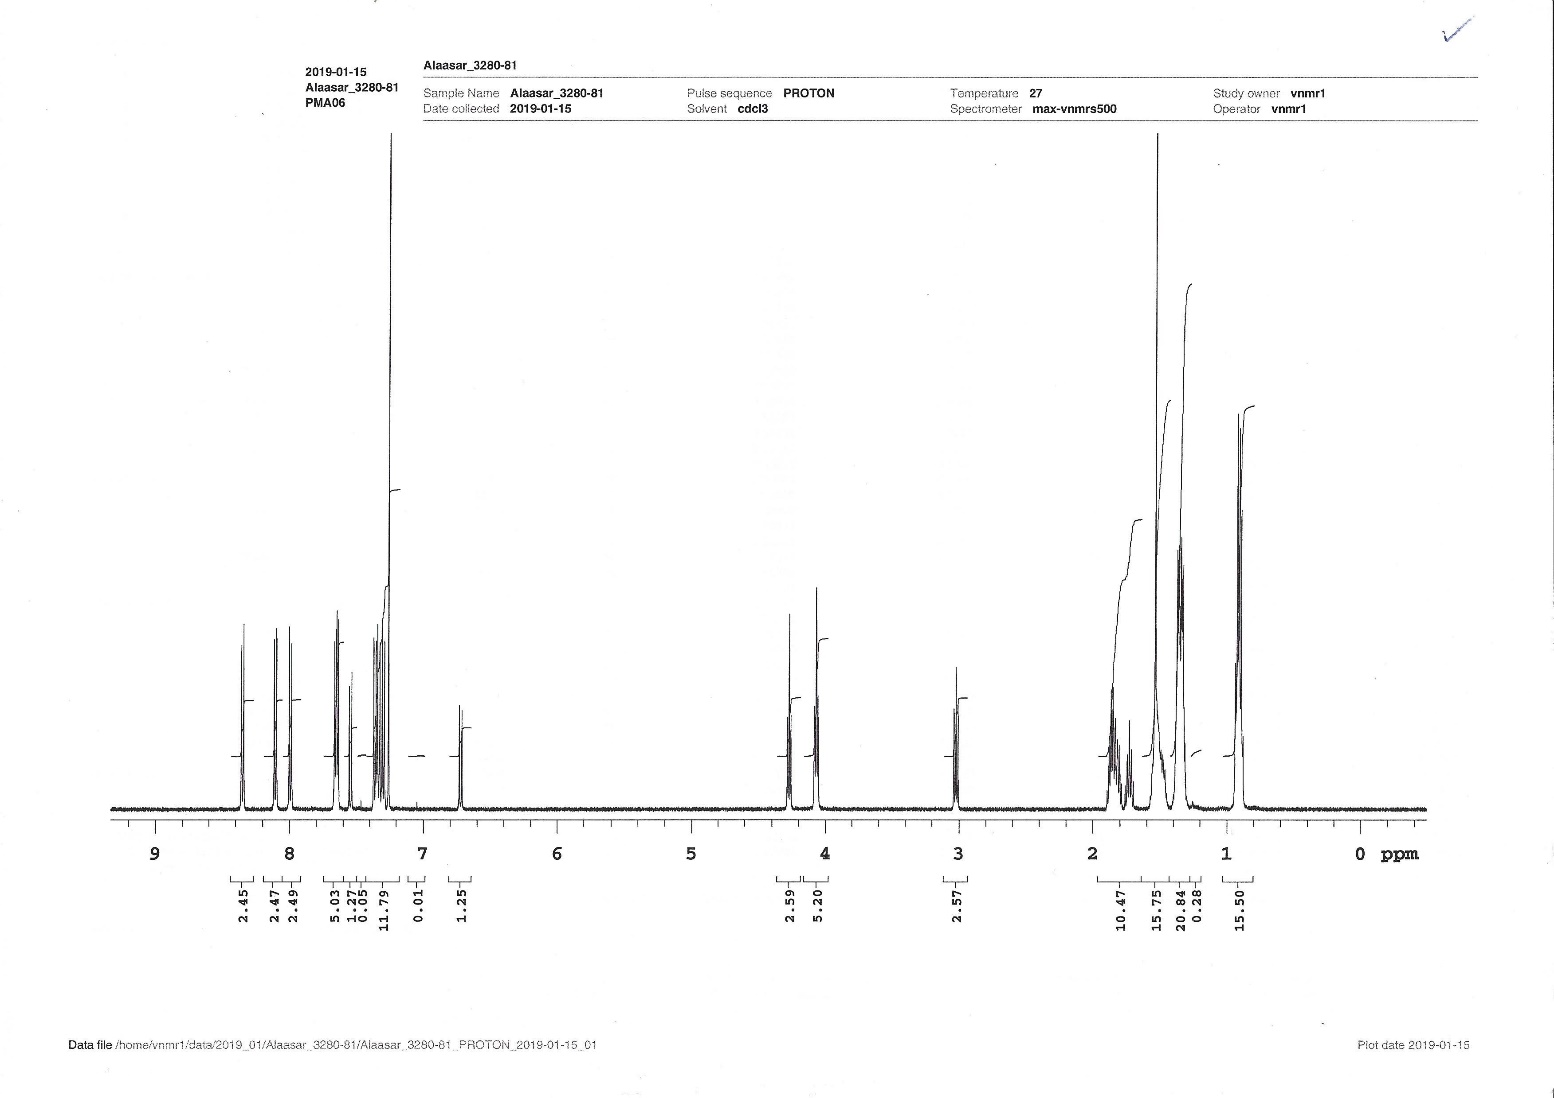


**Figure S3.** 1H-NMR Spectrum of **B** in CDCl3.


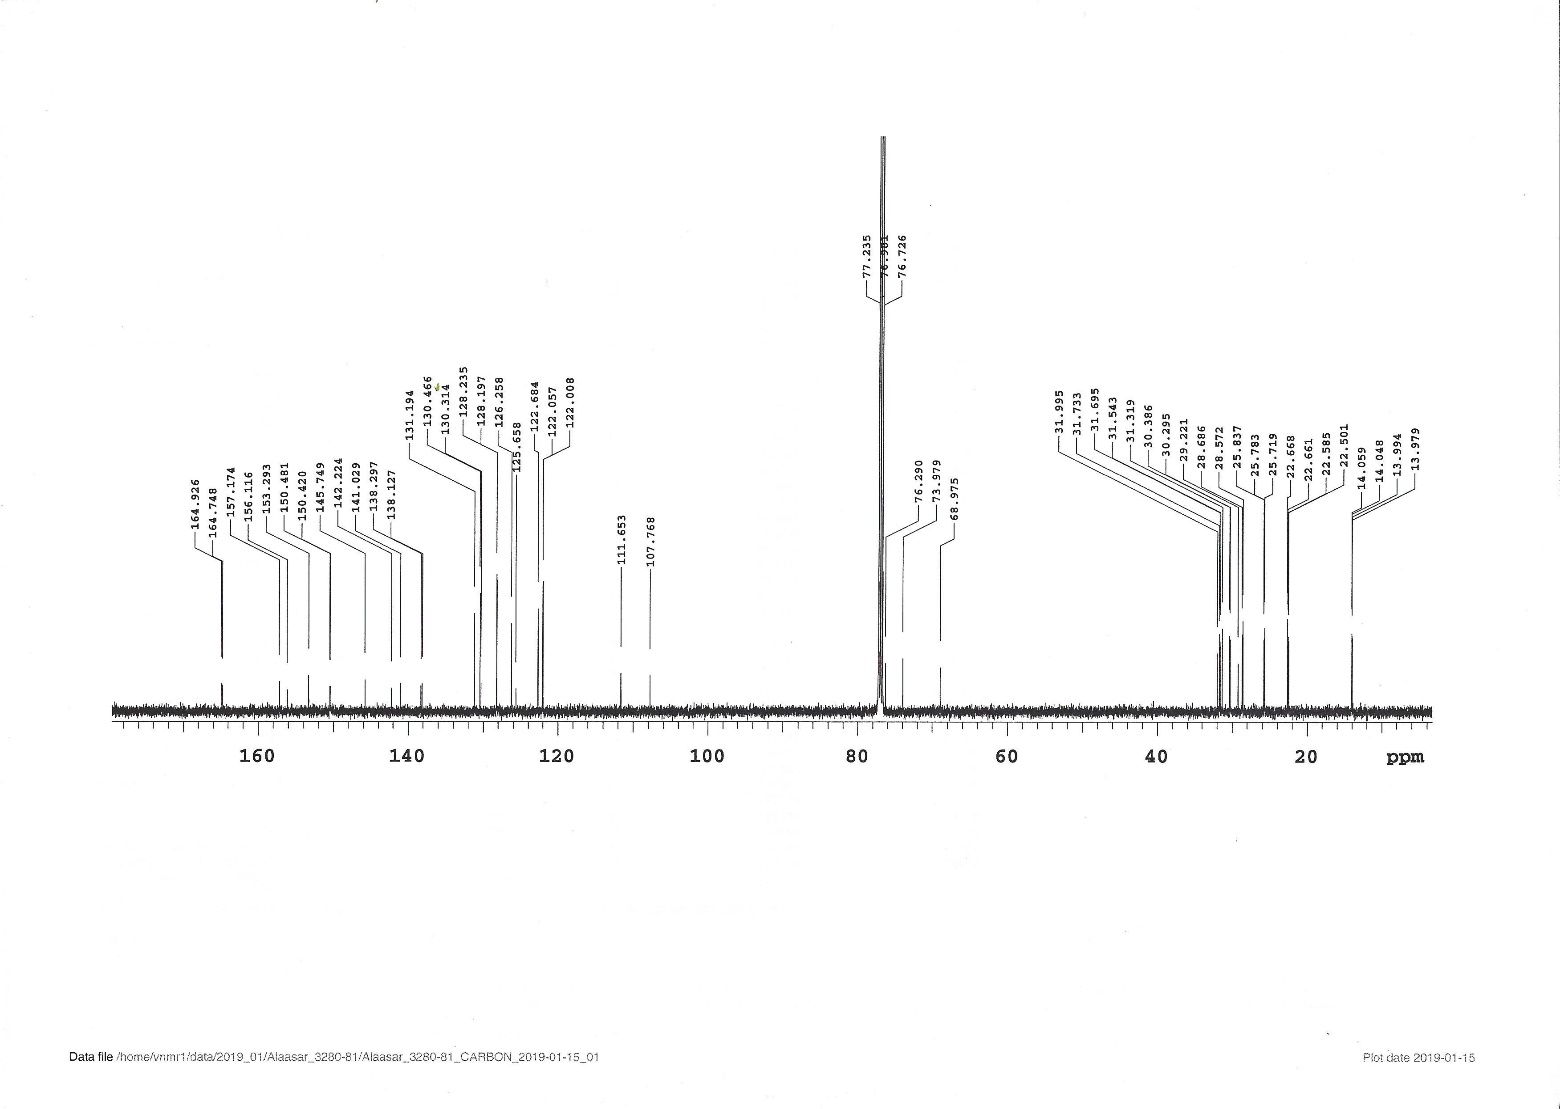


**Figure S4.** 13C-NMR Spectrum of **B** in CDCl3.


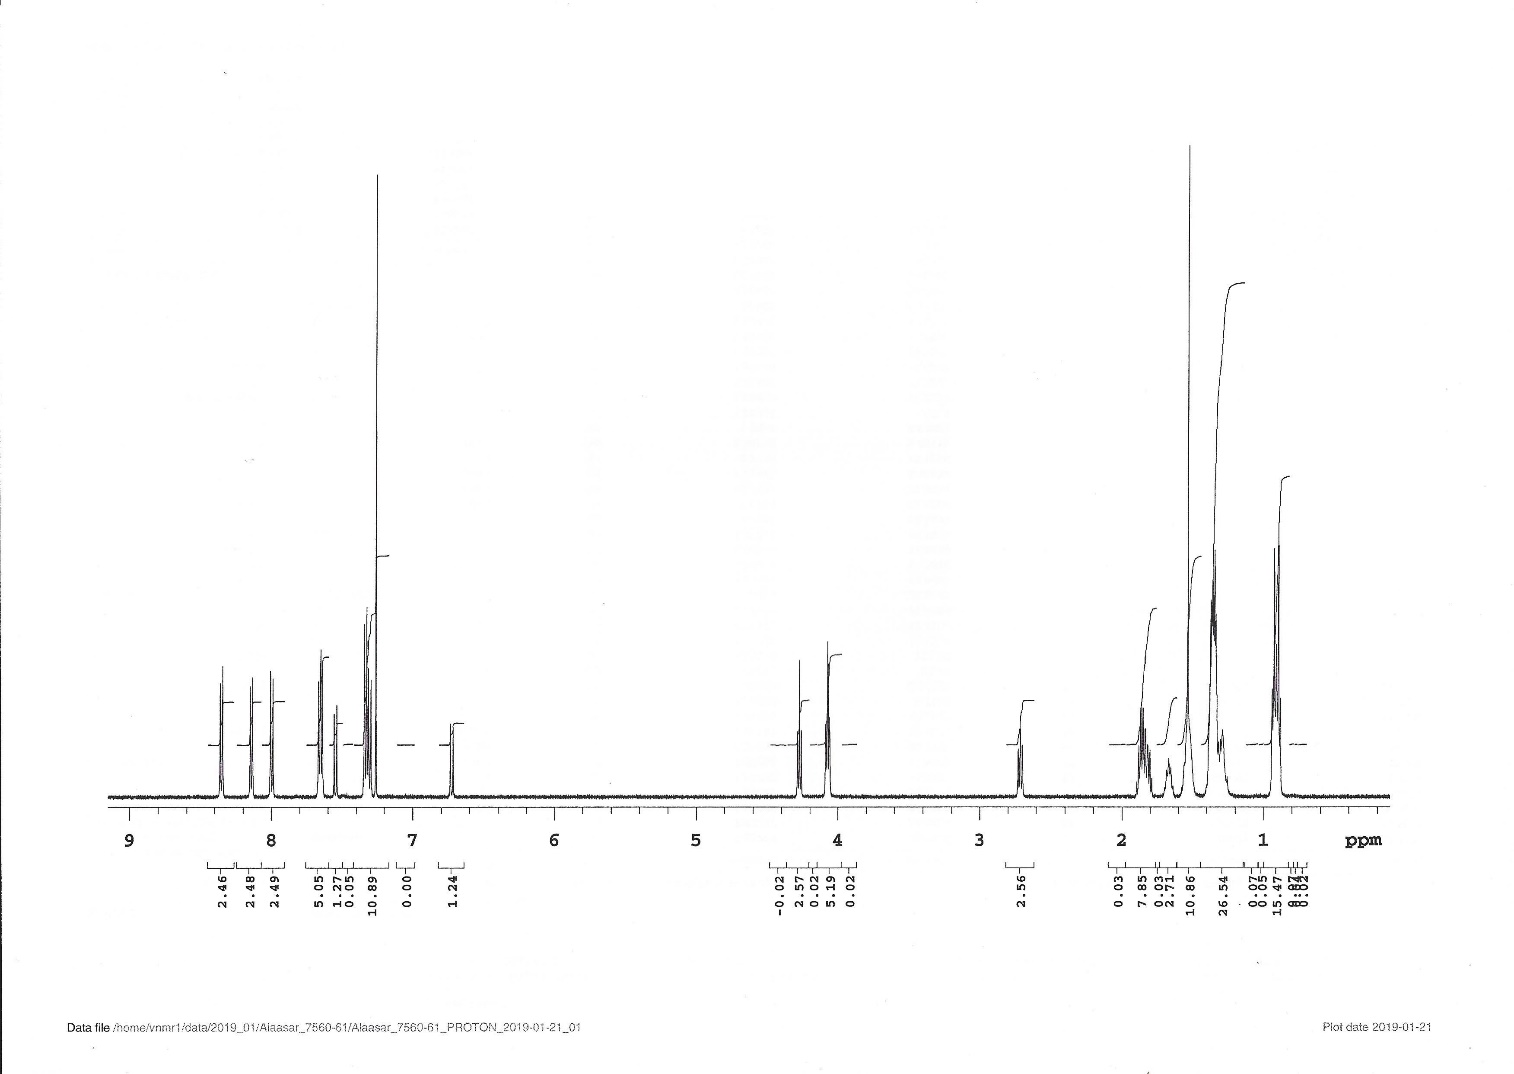


**Figure S5.** 1H-NMR Spectrum of **C** in CDCl3.


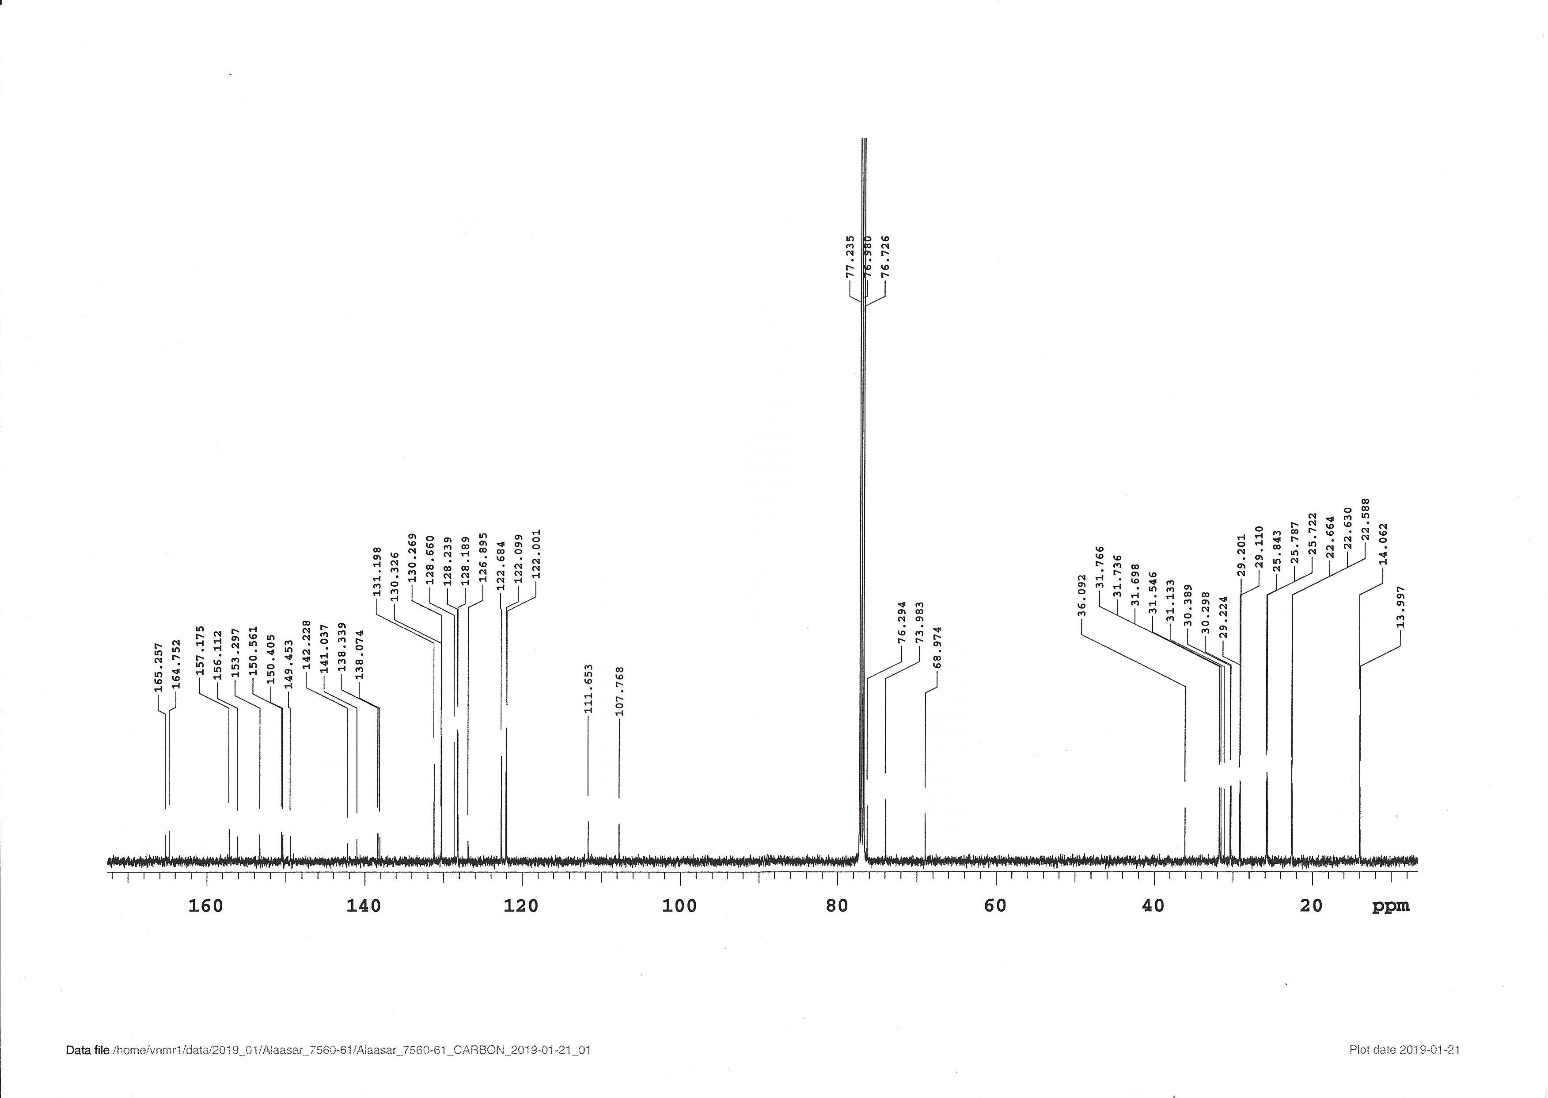


**Figure S6.** 13C-NMR Spectrum of **C** in CDCl3.


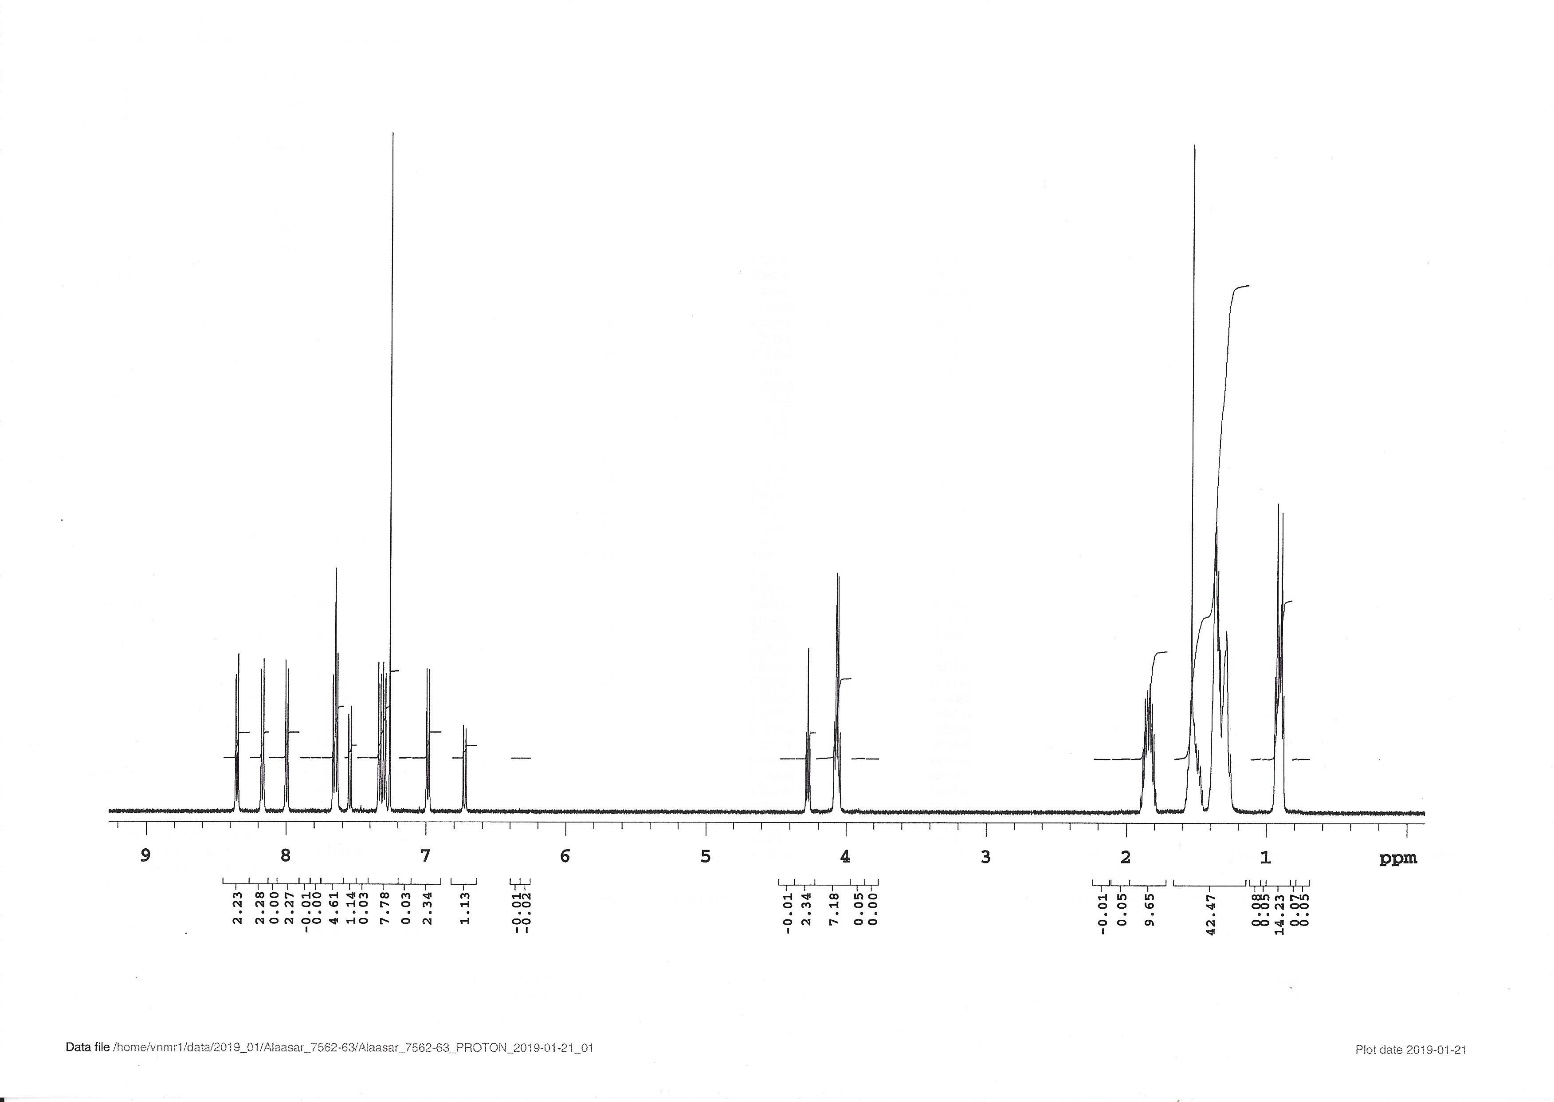


**Figure S7.** 1H-NMR Spectrum of **D** in CDCl3.


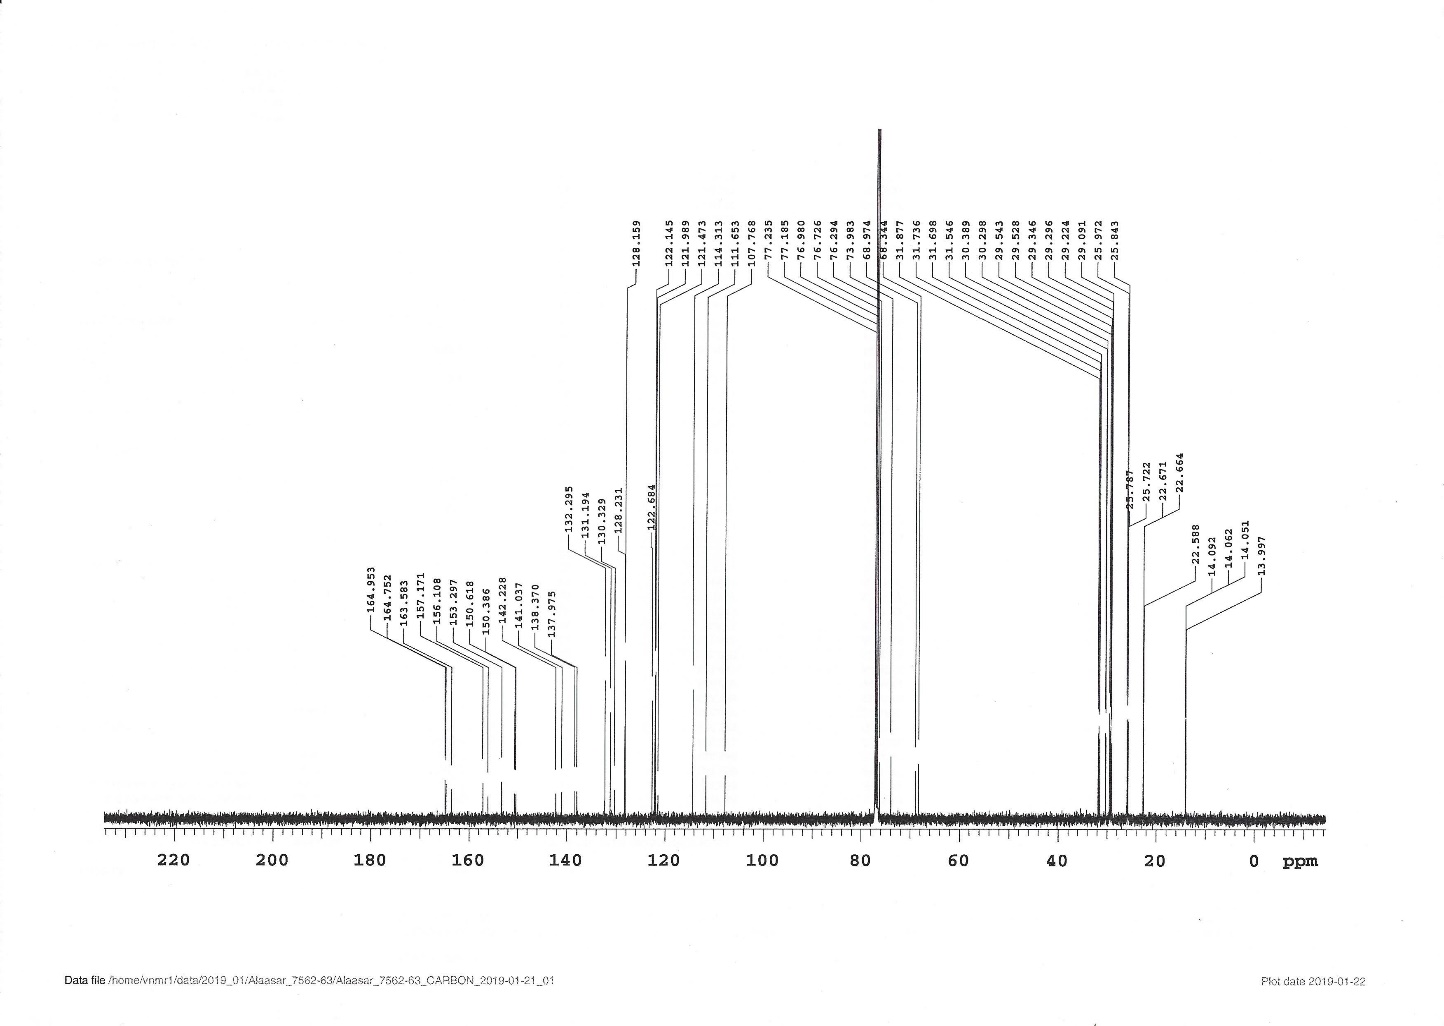


**Figure S8.** 13C-NMR Spectrum of **D** in CDCl3.


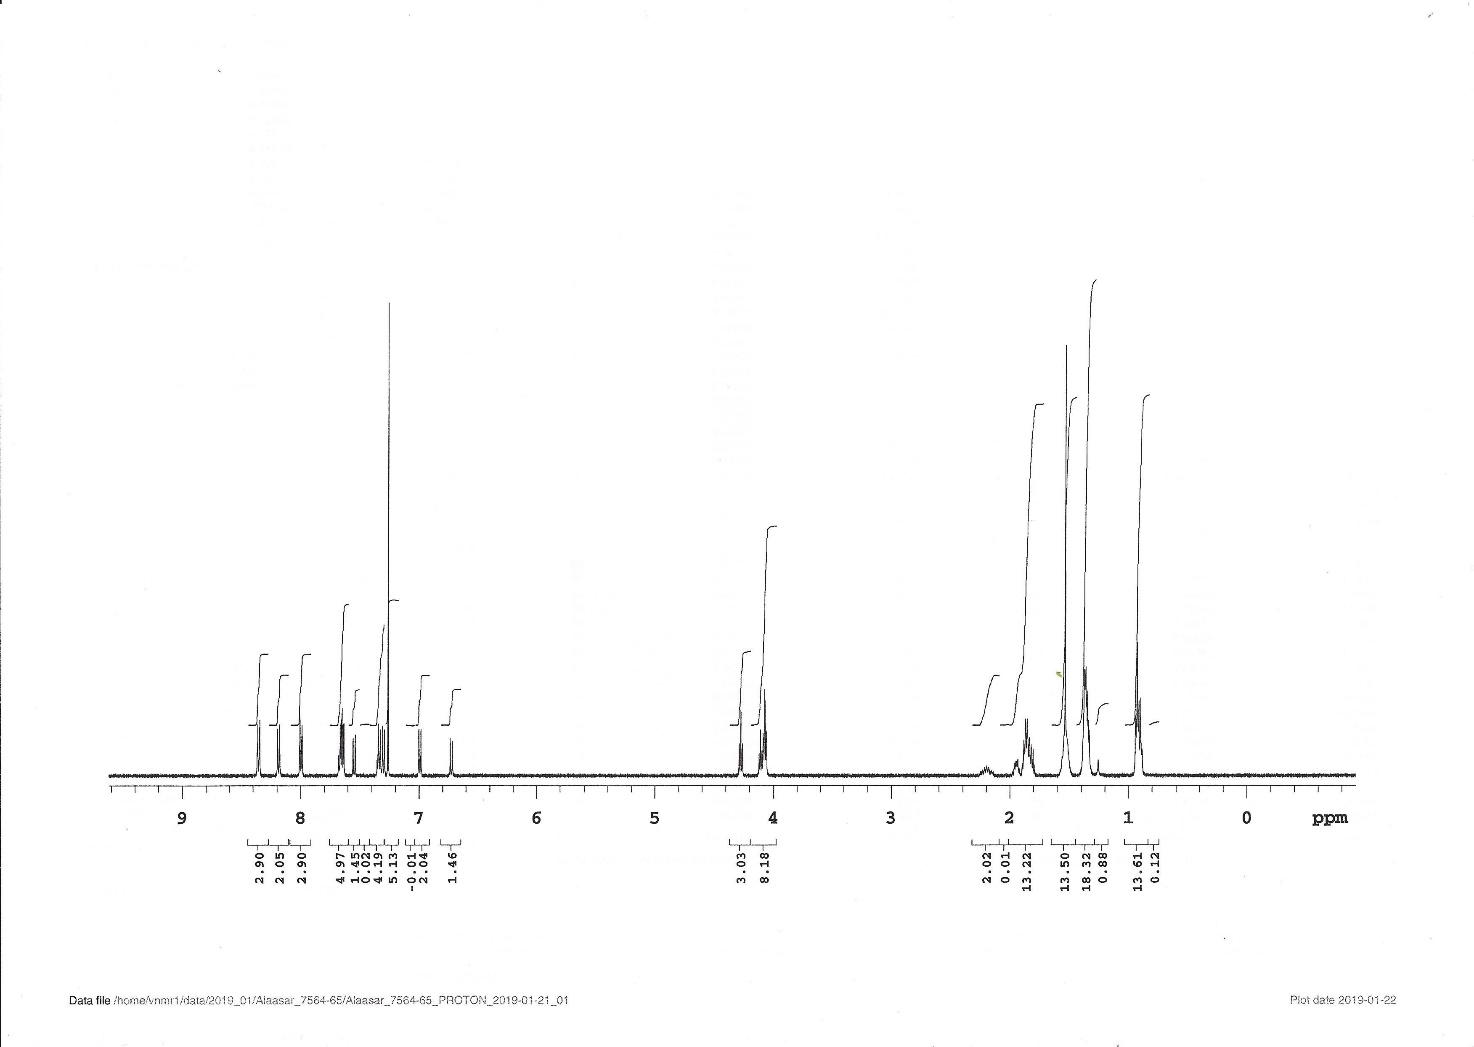


**Figure S9.** 1H-NMR Spectrum of **E** in CDCl3.


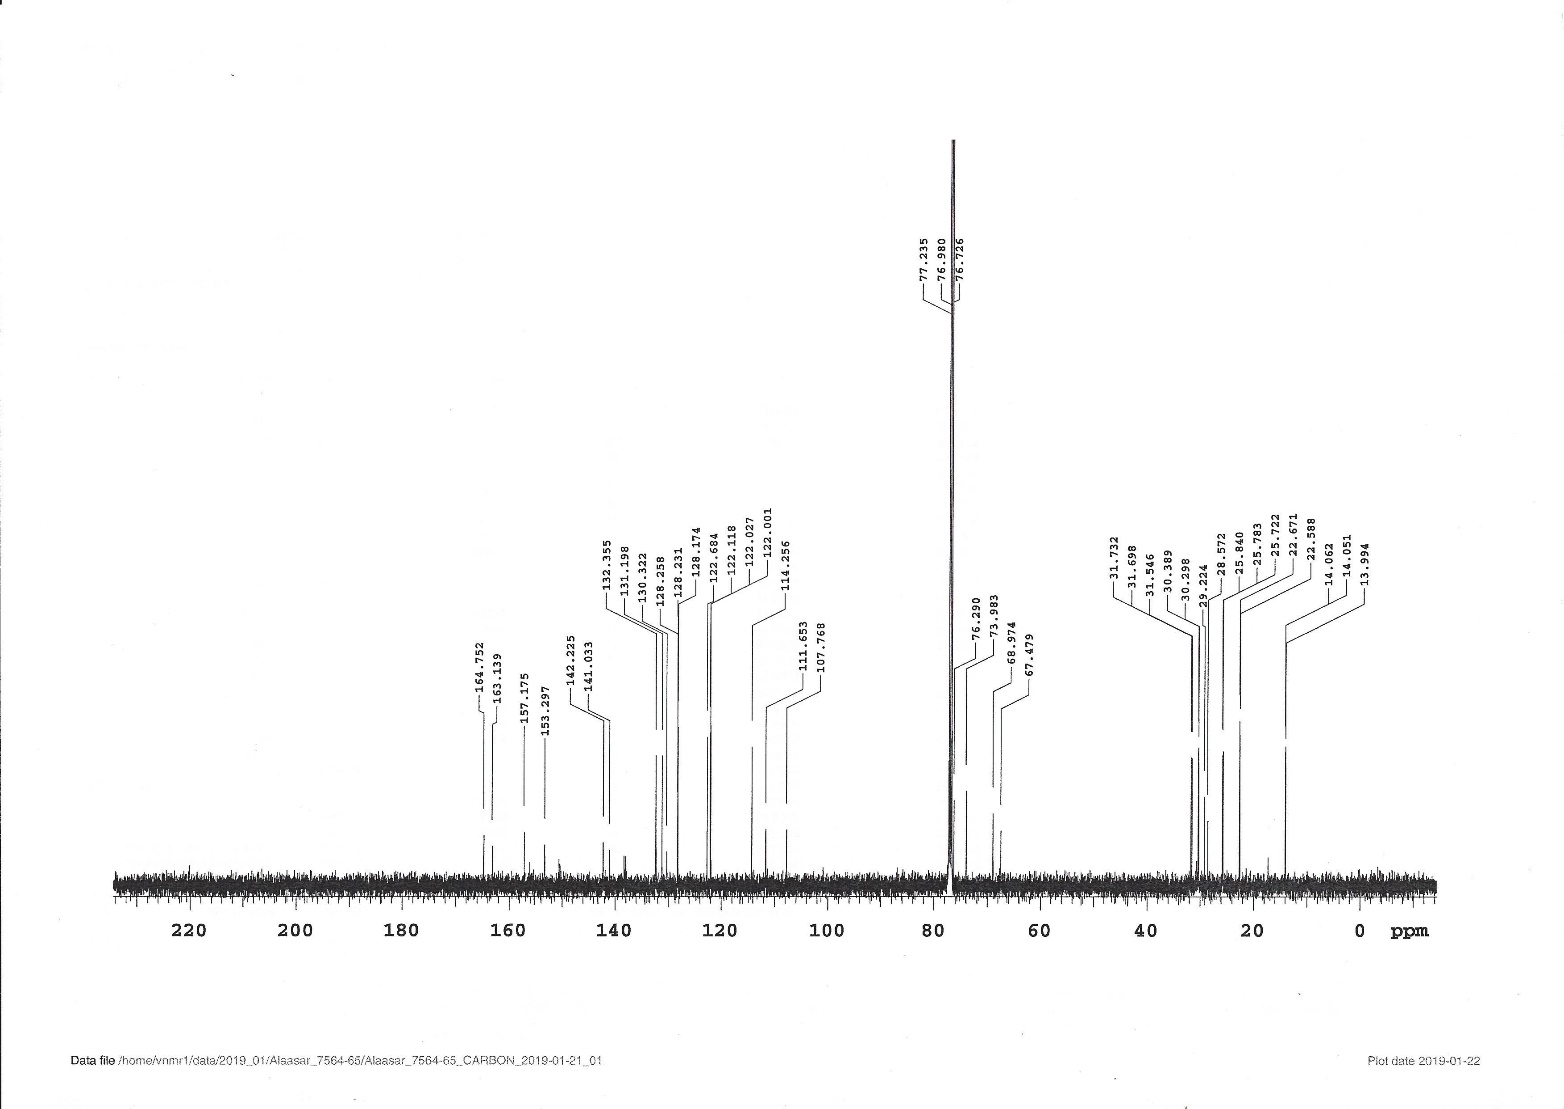


**Figure S10.** 13C-NMR Spectrum of **E** in CDCl3.

**2. Additional DSC curves**

**Figure S11.** DSC Heating and cooling curves of compound **B** (10 K min.-1 heating and cooling rates).

**Figure S12.** DSC Heating and cooling curves of compound **C** (10 K min.-1 heating and cooling rates).

**Figure S13.** DSC Heating and cooling curves of compound **E** (10 K min.-1 heating and cooling rates).
